# Supplementary material
Source: ML conference proceedings conference paper supplement (https://www.ecva.net/papers/eccv_2022/papers_ECCV/html/136760593_ECCV_2022_paper.php)
Supplement: Supplementary file 2 [file 136760593-supp.zip › 4998-code-data-video.txt]

Please find the source code, the dataset and the supplemental video on our project page: https://4dqv.mpi-inf.mpg.de/NeRF-OSR/
